# Supplementary material for: The National Ambulance Surveillance System: A novel method for monitoring acute alcohol, illicit and pharmaceutical drug related-harms using coded Australian ambulance clinical records
Source: PubMed Central journal article supplement (PMC6994147; doi:10.1371/journal.pone.0228316), 2020-01-31
Supplement: pone.0228316.s002.pdf [file pone.0228316.s002.pdf]

**S2 Table Individual pharmaceutical medications coded in the National Ambulance Surveillance System**

| Opioid analgesics    | Other analgesics      | Benzodiazepines | Anti-depressants | Anti-psychotics | Anti-convulsants | Opioid pharmacotherapy treatments | Pharmaceutical stimulants |
|----------------------|-----------------------|-----------------|------------------|-----------------|------------------|-----------------------------------|---------------------------|
| Dextropropoxyphene   | Aspirin               | Alprazolam      | Amitriptyline    | Amisulpride     | Carbamazepine    | Buprenorphine                     | Atomoxetine               |
| Fentanyl             | Aspirin & Codeine     | Bromazepam      | Citalopram       | Aripiprazole    | Gabapentin       | Buprenorphine & Naloxone          | Dexamphetamine            |
| Hydropmorphone       | Codeine               | Clonazepam      | Clomipramine     | Chlorpromazine  | Lamotrigine      | Methadone                         | Methylphenidate           |
| Morphine             | Ibuprofen             | Diazepam        | Desvenlafaxine   | Clozapine       | Pregabalin       | Naltrexone                        | Other                     |
| Oxycodone            | Ibuprofen & Codeine   | Flunitrazepam   | Dothiepin        | Fluphenazine    | Sodium valproate |                                   |                           |
| Oxycodone & Naloxone | Paracetamol           | Lorazepam       | Doxepin          | Haloperidol     | Tiagabine        |                                   |                           |
| Pethidine            | Paracetamol & Codeine | Midazolam       | Duloxetine       | Lithium         | Topiramate       |                                   |                           |
| Tramadol             | Other                 | Nitrazepam      | Escitalopram     | Olanzapine      | Other            |                                   |                           |
| Other                |                       | Oxazepam        | Fluoxetine       | Paliperidone    |                  |                                   |                           |
|                      |                       | Temazepam       | Fluvoxamine      | Pericyazine     |                  |                                   |                           |
|                      |                       | Zolpidem        | Imipramine       | Quetiapine      |                  |                                   |                           |
|                      |                       | Zopiclone       | Mianserin        | Risperidone     |                  |                                   |                           |
|                      |                       | Other           | Mirtazapine      | Trifluoperazine |                  |                                   |                           |
|                      |                       |                 | Moclobemide      | Ziprasidone     |                  |                                   |                           |
|                      |                       |                 | Nortriptyline    | Zuclopthixol    |                  |                                   |                           |
|                      |                       |                 | Paroxetine       | Other           |                  |                                   |                           |
|                      |                       |                 | Reboxetine       |                 |                  |                                   |                           |
|                      |                       |                 | Sertraline       |                 |                  |                                   |                           |
|                      |                       |                 | Venlafaxine      |                 |                  |                                   |                           |
|                      |                       |                 | Other            |                 |                  |                                   |                           |
